# Supplementary material
Source: MDPI journal article supplement (https://www.mdpi.com/2673-9976/27/1/37)
Supplement: s1 [file s1]

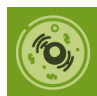

## Supplementary Information

# Extraction and Identification of Aziridine Derivatives in VOCs from *Pleurotus ostreatus*: Impact on Plant Pathogens <sup>†</sup>

Muhammad Usman <sup>1,‡</sup>, Muhammad Akbar <sup>1,‡</sup>, Taswar Ahsan <sup>2,\*</sup> and Muhammad Hamza <sup>3</sup>

<sup>1</sup> Department of Botany, University of Gujrat, Gujrat 50700, Pakistan; mu.usman3214@gmail.com (M.U.); muhammad.akbar@uog.edu.pk (M.A.)

<sup>2</sup> Institute of Plant Protection, Liaoning Academy of Agricultural Sciences, Shenyang 110161, China

<sup>3</sup> Department of Veterinary Sciences, University of Veterinary & Animal Sciences, Lahore 54000, Pakistan; muhammad357@gmail.com

\* Correspondence: taswar.micro@gmail.com or taswarahsan@163.com; Tel.: +86-182-4253-6612

<sup>†</sup> Presented at the 3rd International Electronic Conference on Agronomy, 15–30 October 2023; Available online: <https://ieag2023.sciforum.net/>.

<sup>‡</sup> These authors contribute equally to this work.

**Table S1.** GC/MS Analysis of the n-hexane extract of *Pleurotus ostreatus*.

| Scheme | R.Time | Name of Compound                                                                                 | Molecular Formula                                                                     | Molecular Weight | Peak Area |
|--------|--------|--------------------------------------------------------------------------------------------------|---------------------------------------------------------------------------------------|------------------|-----------|
| 1.     | 1.610  | Pentane, 2- Methyl                                                                               | C <sub>6</sub> H <sub>14</sub>                                                        | 86               | 0.43      |
| 2.     | 1.633  | Pentane                                                                                          | C <sub>5</sub> H <sub>12</sub>                                                        | 72               | 0.10      |
| 3.     | 2.440  | Butane, 2,3-dimethyl-                                                                            | C <sub>6</sub> H <sub>14</sub>                                                        | 86               | 0.10      |
| 4.     | 2.921  | Pentane, 3-methyl                                                                                | C <sub>6</sub> H <sub>14</sub>                                                        | 86               | 0.20      |
| 5.     | 2.985  | (Methylpentane)<br>3-Methyl Pentane                                                              | (C <sub>2</sub> H <sub>5</sub> )<br>2CHCH <sub>3</sub>                                | 86               | 0.43      |
| 6.     | 3.173  | Hexane, 2,2,3-trimethyl-                                                                         | C <sub>9</sub> H <sub>20</sub>                                                        | 128              | 0.35      |
| 7.     | 3.554  | 1-Butanol, 2-methyl- (Butyl-carbinol)                                                            | C <sub>5</sub> H <sub>12</sub> O                                                      | 88               | 0.35      |
| 8.     | 3.208  | Hexane                                                                                           | C <sub>6</sub> H <sub>14</sub>                                                        | 86               | 0.48      |
| 9.     | 3.587  | Butane, 2,2,3-trimethyl-                                                                         | C <sub>7</sub> H <sub>16</sub>                                                        | 100              | 0.72      |
| 10.    | 3.662  | Pentane, 2,4-dimethyl-                                                                           | C <sub>7</sub> H <sub>16</sub>                                                        | 100              | 0.69      |
| 11.    | 3.876  | Cyclopentane, methyl (Methyl-cyclopentane)                                                       | C <sub>6</sub> H <sub>12</sub>                                                        | 84               | 0.55      |
| 12.    | 4.251  | Cyclopentane, methyl-                                                                            | C <sub>6</sub> H <sub>12</sub>                                                        | 84               | 0.58      |
| 13.    | 4.174  | 1-Pentene, 2-methyl-                                                                             | C <sub>6</sub> H <sub>12</sub>                                                        | 84               | 1.24      |
| 14.    | 4.891  | 4-Methyl-4-pentene                                                                               | C <sub>2</sub> H <sub>5</sub> CH <sub>2</sub> C<br>(CH <sub>3</sub> )=CH <sub>2</sub> | 84               | 0.61      |
| 15.    | 5.491  | Aziridine, 2-methyl-3-(1-methylethyl)-, trans- Aziridine, 2-isopropyl-3-methyl-                  | C <sub>6</sub> H <sub>13</sub> N                                                      | 99               | 0.51      |
| 16.    | 5.874  | Triazine, 2,4,6-tris(cyanomethoxy)- 2, 2', 2''-[1,3,5-Triazine-2,4,6-triyltris(oxy)] triacetone- | C <sub>9</sub> H <sub>6</sub> N <sub>6</sub> O <sub>3</sub>                           | 246              | 0.50      |
| 17.    | 6.494  | Cyclopentane, methyl- Methyl-cyclopentane                                                        | C <sub>6</sub> H <sub>12</sub>                                                        | 84               | 0.52      |

|     |       |                                                                                               |                                                |     |      |
|-----|-------|-----------------------------------------------------------------------------------------------|------------------------------------------------|-----|------|
| 18. | 6.329 | 2-Butenedioic acid, 2-methyl-, Citraconic acid, Methylmaleic acid, cis-Methylbutenedioic acid | C <sub>5</sub> H <sub>6</sub> O <sub>4</sub>   | 130 | 7.21 |
| 19. | 6.459 | Cyclopentane, methyl-                                                                         | C <sub>6</sub> H <sub>12</sub>                 | 84  | 31.2 |
| 20. | 6.601 | Toluene                                                                                       | C <sub>7</sub> H <sub>8</sub>                  | 92  | 5.87 |
| 21. | 6.775 | Toluene-Benzene, methyl-Methacide, Methylbenzol-Phenylmethane-Antisal                         | C <sub>7</sub> H <sub>8</sub>                  | 92  | 2.55 |
| 22. | 6.947 | cis-5,8,11,14,17-Eicosapentaenoic Acid                                                        | C <sub>20</sub> H <sub>30</sub> O <sub>2</sub> | 302 | 1.47 |
| 23. | 7.107 | 9,12-Octadecadienoic acid (Z,Z)-                                                              | C <sub>18</sub> H <sub>32</sub> O <sub>2</sub> | 280 | 2.06 |
| 24. | 7.195 | Hexadecanoic acid, 2-hydroxy-1-(hydroxymethyl)ethyl ester                                     | C <sub>19</sub> H <sub>38</sub> O <sub>4</sub> | 330 | 0.29 |
| 25. | 7.305 | trans-8-Isopropylbicyclo[4.3.0]non-3-en                                                       | C <sub>12</sub> H <sub>20</sub>                | 164 | 0.34 |
| 26. | 7.657 | Cholesta-4,6-dien-3-ol, (3.β.)-                                                               | C <sub>29</sub> H <sub>46</sub> O <sub>2</sub> | 426 | 0.59 |
